# Supplementary material
Source: PubMed Central journal article supplement (PMC1188264)
Supplement: bj3890145add.pdf [file bj3890145add.pdf]

| Octasaccharide designation | Structure       | Source | NaCl conc. (M) required for elution |          |          |          |
|----------------------------|-----------------|--------|-------------------------------------|----------|----------|----------|
|                            |                 |        | FGF1 <sup>A</sup>                   | FGF4     | FGF7     | FGF8b    |
|                            | 1 2 3 4 5 6 7 8 |        |                                     |          |          |          |
| 0/2-0/6                    |                 | LIB    | --                                  | <0.14    | <0.14    | <0.14    |
| 1/2-0/6-a                  |                 | LIB    | --                                  | <0.14    | <0.14    | 0.14-0.2 |
| 1/2-0/6-b                  |                 | LIB    | --                                  | <0.14    | --       | --       |
| 0/2-1/6                    |                 | LIB    | --                                  | 0.2      | <0.14    | 0.14-0.2 |
| 2/2-0/6-a                  |                 | LIB    | --                                  | 0.25-0.3 | 0.1-0.15 | 0.2-0.3  |
| 2/2-0/6-b                  |                 | LIB    | --                                  | 0.3-0.35 | 0.1-0.15 | --       |
| 2/2-0/6-c                  |                 | LIB    | --                                  | 0.25-0.3 | 0.1-0.15 | 0.2-0.3  |
| 2/2-0/6-d                  |                 | LIB    | --                                  | 0.3-0.35 | 0.1-0.15 | --       |
| 0/2-2/6-a                  |                 | LIB    | --                                  | --       | --       | 0.2-0.3  |
| 0/2-2/6-b                  |                 | LIB    | --                                  | --       | --       | 0.2-0.3  |
| 1/2-1/6-a                  |                 | LIB    | 0.15-0.3                            | 0.3-0.35 | --       | 0.2-0.3  |
| 1/2-1/6-b                  |                 | LIB    | --                                  | 0.25     | --       | --       |
| 1/2-1/6-c                  |                 | LIB    | 0.15-0.3                            | 0.3-0.35 | 0.1-0.15 | 0.2-0.3  |
| 3/2-0/6-a                  |                 | LIB    | --                                  | 0.4      | 0.1-0.15 | 0.3      |
| 3/2-0/6-b                  |                 | LIB    | --                                  | 0.4      | 0.15     | --       |
| 3/2-0/6-c                  |                 | LIB    | --                                  | 0.4      | 0.15     | --       |
| 0/2-3/6-a                  |                 | LIB    | 0.15-0.2                            | 0.3      | 0.15     | 0.3      |
| 0/2-3/6-b                  |                 | LIB    | --                                  | 0.35     | --       | 0.3      |
| 2/2-1/6-a                  |                 | HS     | 0.5                                 | 0.4      | 0.1-0.15 | 0.3      |
| 2/2-1/6-b                  |                 | HS     | --                                  | --       | --       | 0.4      |
| 2/2-1/6-c                  |                 | HS     | --                                  | --       | --       | 0.3      |

Supplementary Table 1

| Octasaccharide designation | Structure       | Source | NaCl conc. (M) required for elution |           |          |         |
|----------------------------|-----------------|--------|-------------------------------------|-----------|----------|---------|
|                            |                 |        | FGF1 <sup>A</sup>                   | FGF4      | FGF7     | FGF8b   |
|                            | 1 2 3 4 5 6 7 8 |        |                                     |           |          |         |
| 2/2-1/6-d                  |                 | LIB    | --                                  | --        | 0.15     | --      |
| 2/2-1/6-e                  |                 | LIB    | --                                  | --        | 0.15     | --      |
| 1/2-2/6-a                  |                 | LIB    | 0.3-0.4                             | 0.35-0.4  | --       | --      |
| 1/2-2/6-b                  |                 | HS     | 0.2                                 | 0.35-0.4  | --       | --      |
| 1/2-2/6-c                  |                 | LIB    | 0.3-0.4                             | 0.35-0.4  | --       | --      |
| 4/2-0/6                    |                 | LIB    | --                                  | 0.4       | 0.2      | 0.3-0.4 |
| 2/2-2/6-a                  |                 | HS     | 0.5-0.7                             | 0.5       | 0.15-2-0 | 0.4-0.5 |
| 2/2-2/6-b                  |                 | HS     | 0.5-0.7                             | --        | --       | 0.5     |
| 2/2-2/6-c                  |                 | LIB    | --                                  | 0.45-0.55 | --       | --      |
| 2/2-2/6-d                  |                 | HS     | 0.5                                 | 0.5       | 0.15-2-0 | 0.5     |
| 2/2-2/6-e                  |                 | LIB    | 0.5-0.7                             | 0.45-0.55 | --       | --      |
| 2/2-2/6-f                  |                 | HS     | 0.2                                 | --        | --       | 0.4     |
| 2/2-2/6-g                  |                 | HS     | --                                  | --        | --       | 0.4     |
| 3/2-1/6-a                  |                 | LIB    | --                                  | --        | 0.25     | --      |
| 3/2-1/6-b                  |                 | LIB    | --                                  | --        | 0.25     | --      |
| 3/2-2/6                    |                 | LIB    | 0.7-1.0                             | --        | --       | 0.5     |
| 2/2-3/6-a                  |                 | HS     | 1.0                                 | --        | --       | 0.7     |
| 2/2-3/6-b                  |                 | HS     | 1.0                                 | --        | --       | 0.7     |

Supplementary Table 1
